# Supplementary material for: Lentivirus-Mediated BCL-XL Overexpression Inhibits Stem Cell Apoptosis during Ex Vivo Expansion and Provides Competitive Advantage Following Xenotransplantation
Source: MDPI journal article supplement (doi:10.3390/ijms25074105), 2024-04-07
Supplement: s1 [file s1]

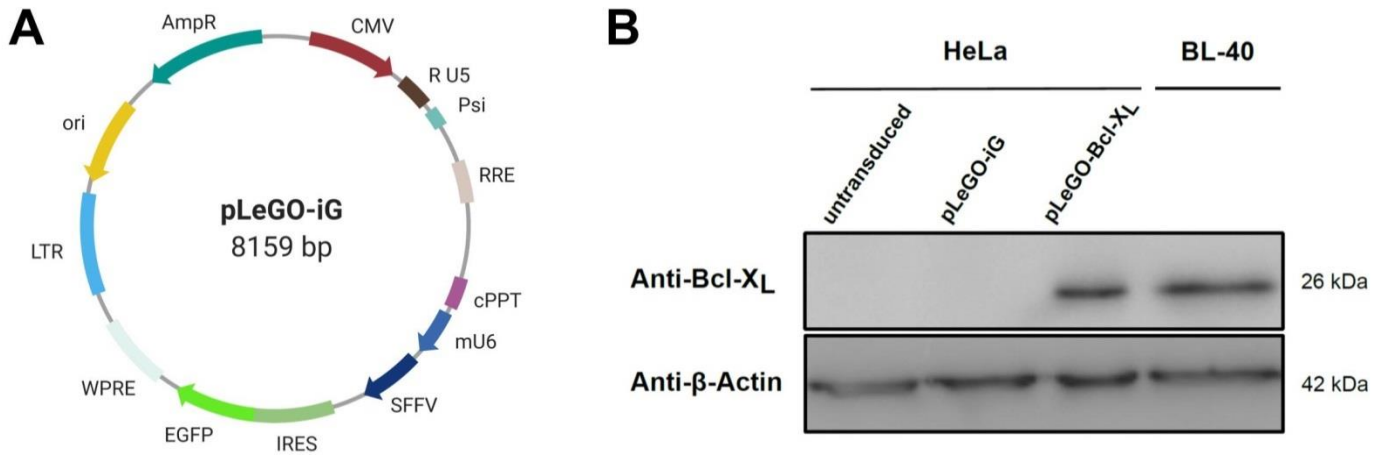

### Supplementary Figure 1: Lentiviral transduction with pLeGO-iG and pLeGO-BCL-X<sub>L</sub>.

A: Vector map of pLeGO-iG. B:  $1 \times 10^6$  HeLa cells were lentivirally transduced with pLeGO-iG (control) or pLeGO-BCL-X<sub>L</sub> (MOI = 10 - 20), or remained untransduced. After three days the cells were pelleted, proteins were isolated, and the BCL-X<sub>L</sub> protein content was analyzed by western blot. The Burkitt lymphoma cell line BL40 served as a positive control,  $\beta$ -actin as a loading control.

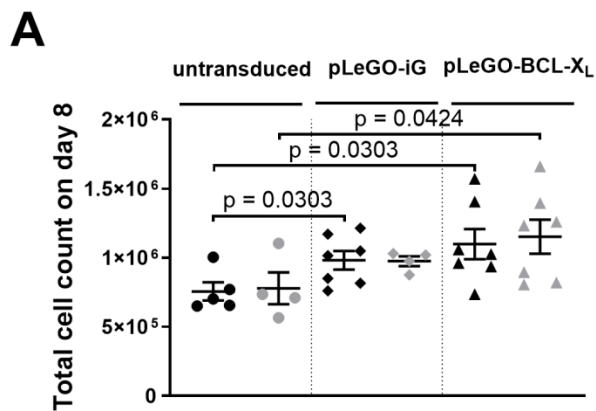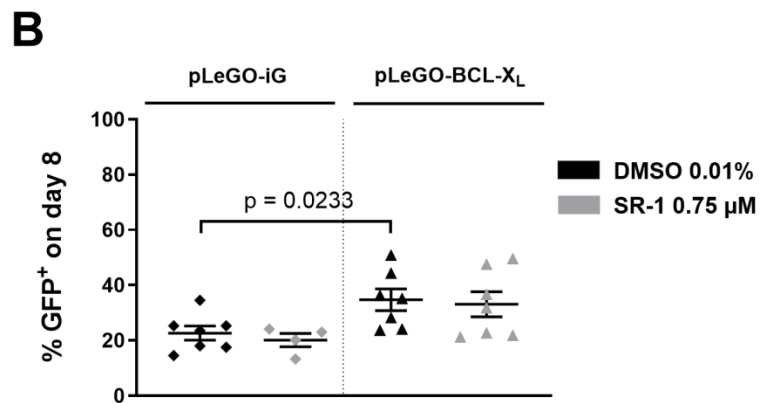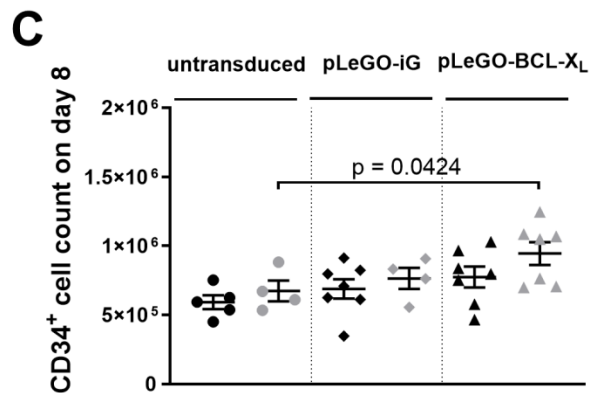

### Supplementary Figure 2: Characteristics of lentivirally transduced and expanded CD34<sup>+</sup> cells prior to transplantation.

For experimental design see Figure 3A. The progeny of  $1 \times 10^5$  CD34<sup>+</sup> cells was counted and analyzed by flow cytometry on day 8 of culture prior to transplantation. A: Total cell count on day 8. B: % GFP<sup>+</sup> of live cells on day 8. C: CD34<sup>+</sup> cell count on day 8. Bars represent means of  $n = 4 - 7$  from 8 independent experiments  $\pm$ SEM. Significant  $p$  values are indicated (Mann-Whitney Test).
